# Supplementary figures and images for: Enzyme-catalysed oxidation of 1,2-disulfides to yield chiral thiosulfinate, sulfoxide and cis-dihydrodiol metabolites
Source: Royal Society of Chemistry journal article supplement (doi:10.1039/c4ra02923b), 2014-01-01

(v)  $^1\text{H}$ -NMR spectrum of compound 15 (500MHz,  $\text{CDCl}_3$ )

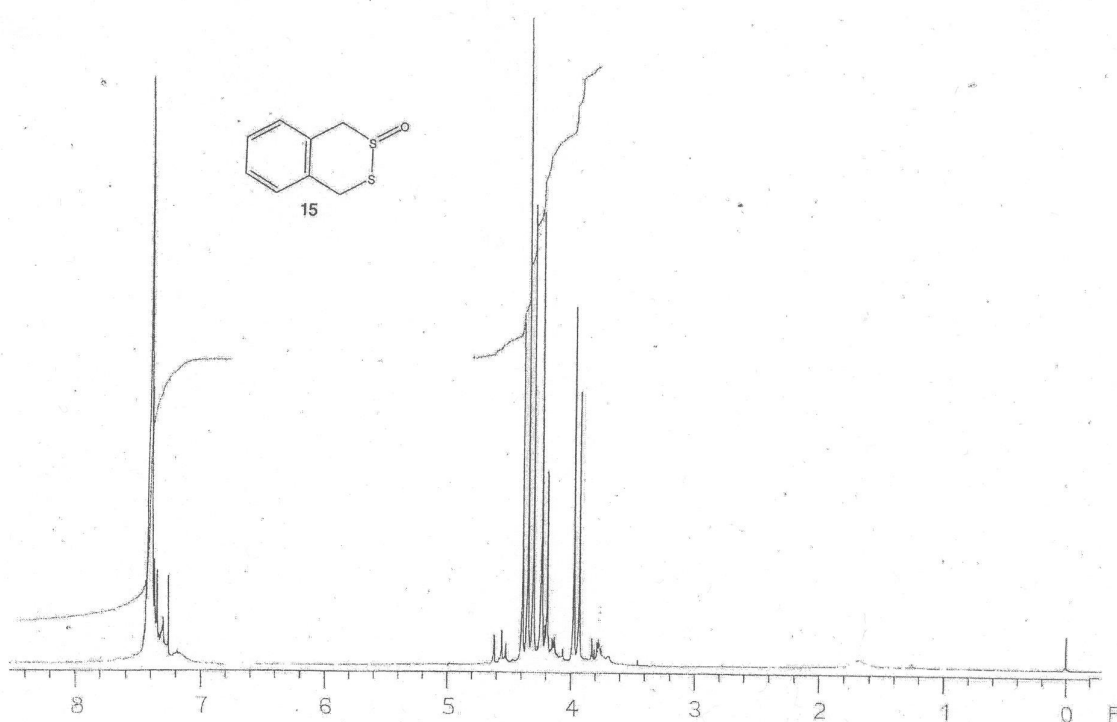

Supplement: c4ra02923b10.pdf [file c4ra02923b10.pdf]

(xiii) ECD spectra for enantiomers  $13_R$ ,  $13_S$ ,  $15_R$  and  $15_S$  (MeCN)

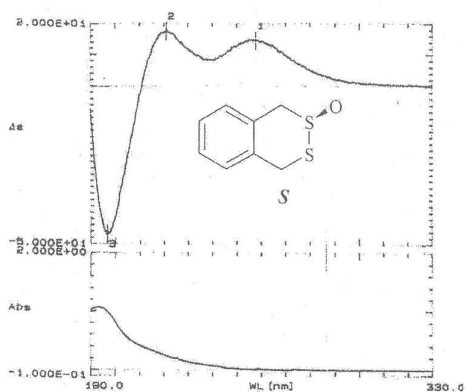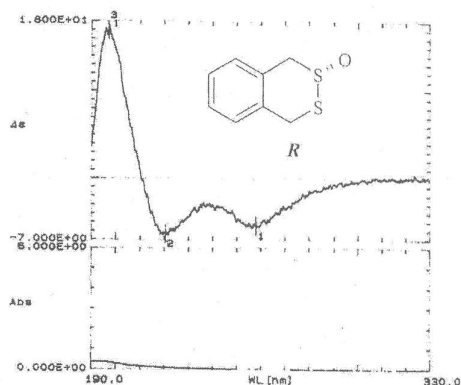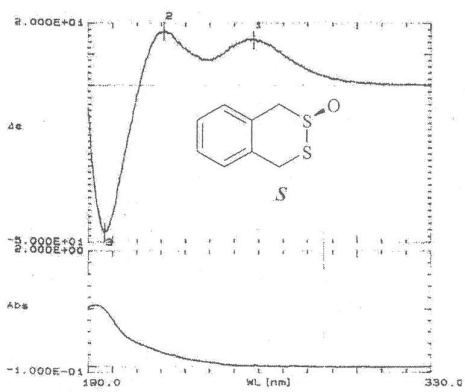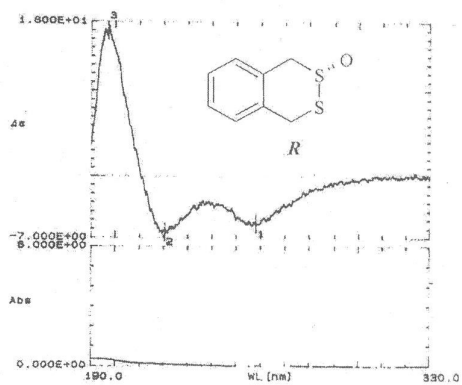

Supplement: c4ra02923b11.pdf [file c4ra02923b11.pdf]

(xii) CSPHPLC separation of enantiomers  $15_R$  and  $15_S$  (Whelk-01, % t-BuOMe, 1.5ml/min)

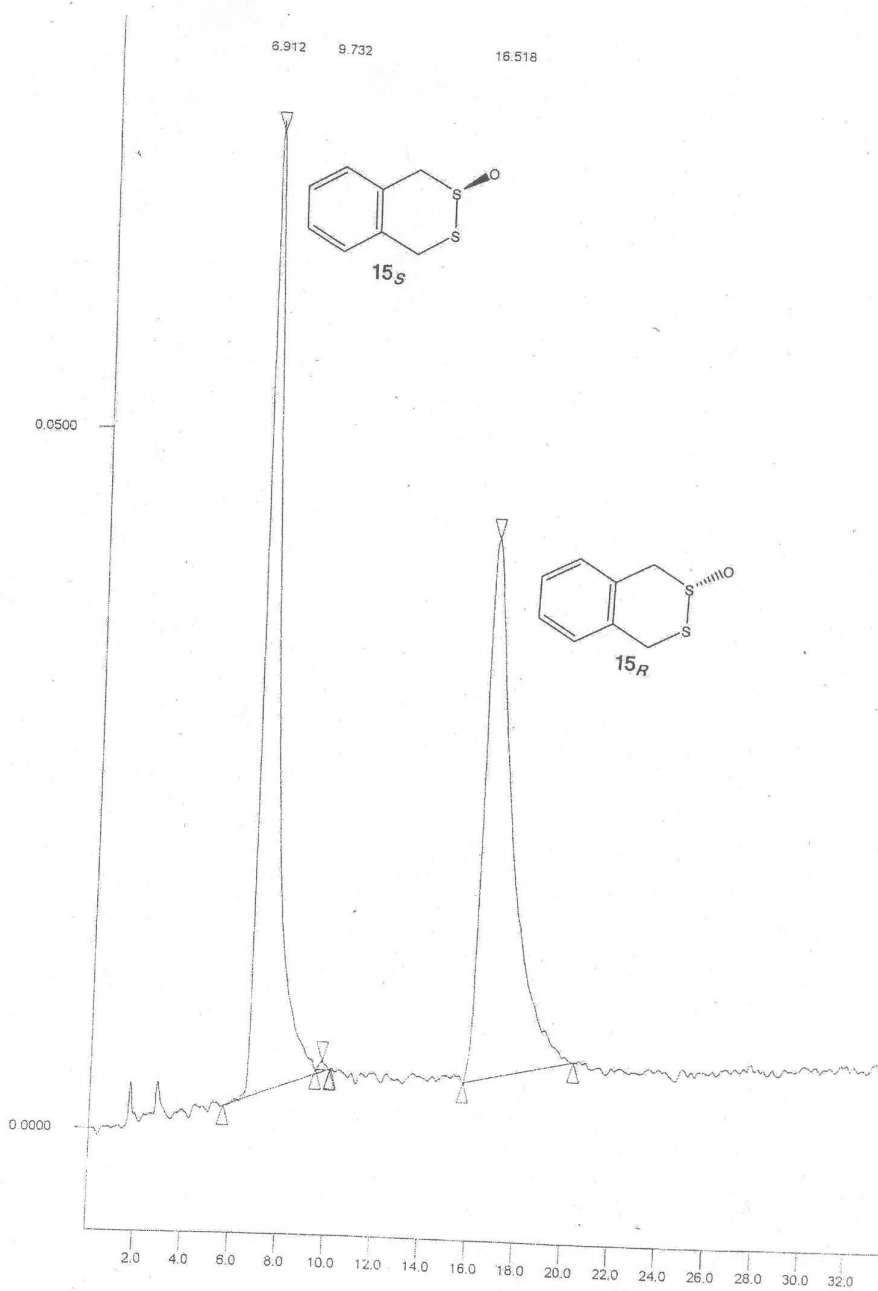

Supplement: c4ra02923b12.pdf [file c4ra02923b12.pdf]

(xiv) X-ray crystal structure of compound 25

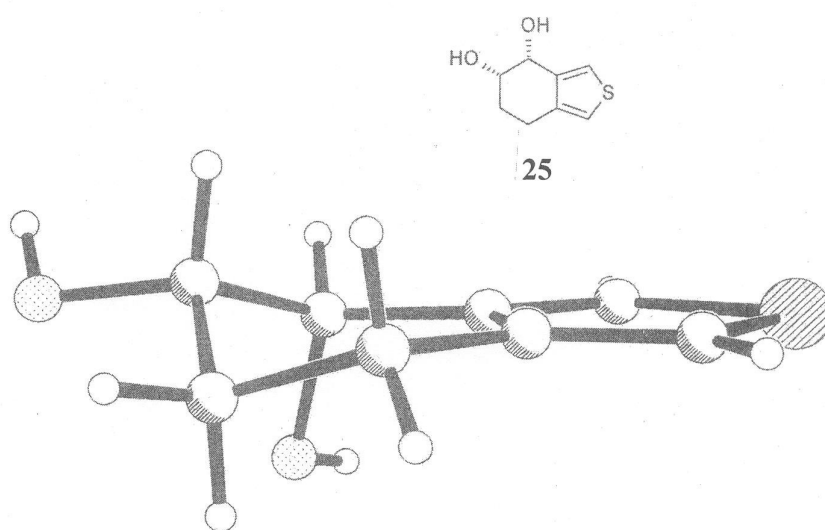

Supplement: c4ra02923b13.pdf [file c4ra02923b13.pdf]

(xi) CSPHPLC separation of enantiomers  $13_R$  and  $13_S$  (Whelk-01, 50% t-BuOMe-50% n-hexane, 1.5ml/min)

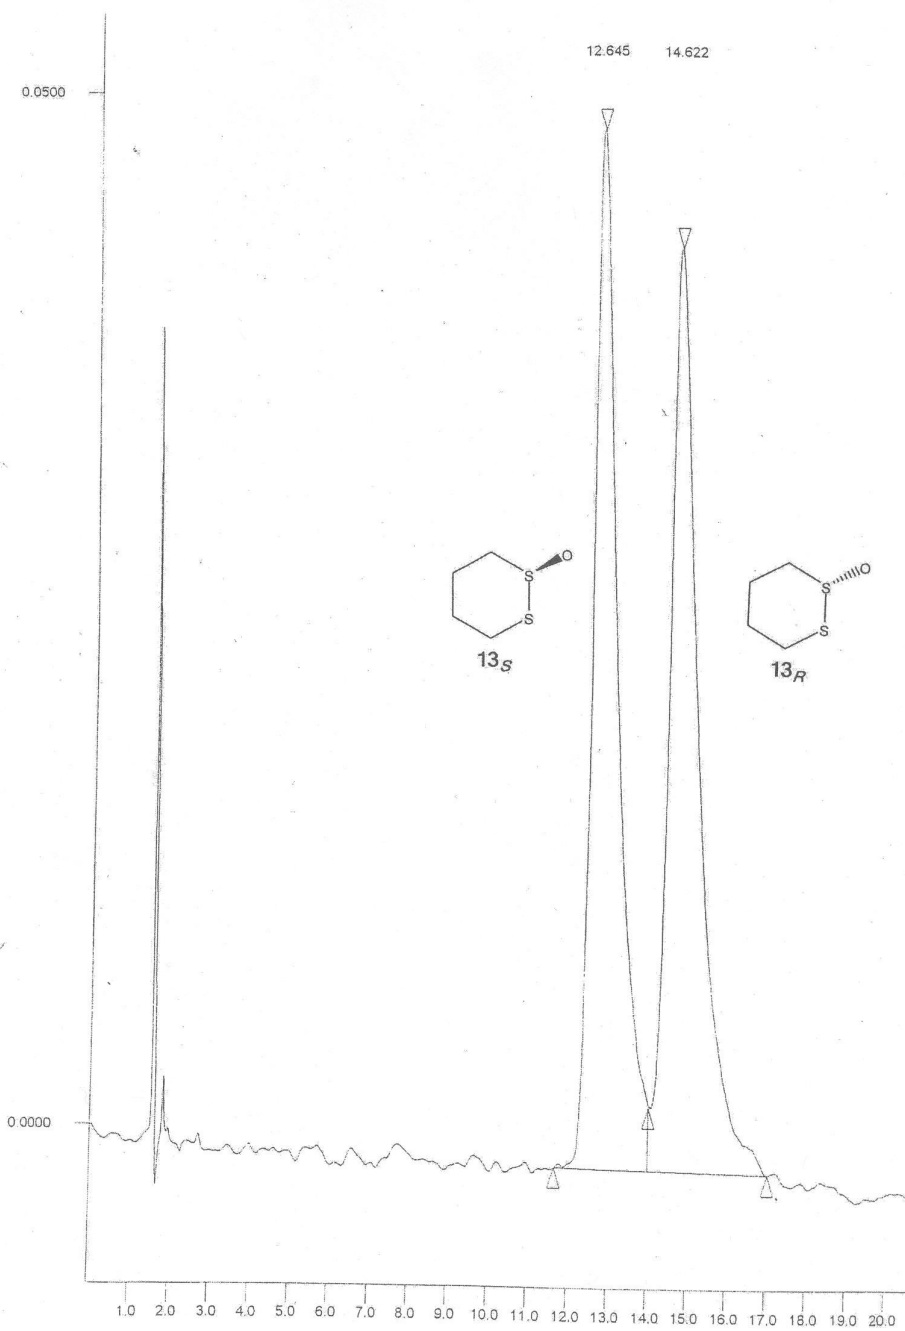

Supplement: c4ra02923b14.pdf [file c4ra02923b14.pdf]

(iii)  $^1\text{H}$ -NMR spectrum of compound 13 (300MHz,  $\text{CDCl}_3$ )

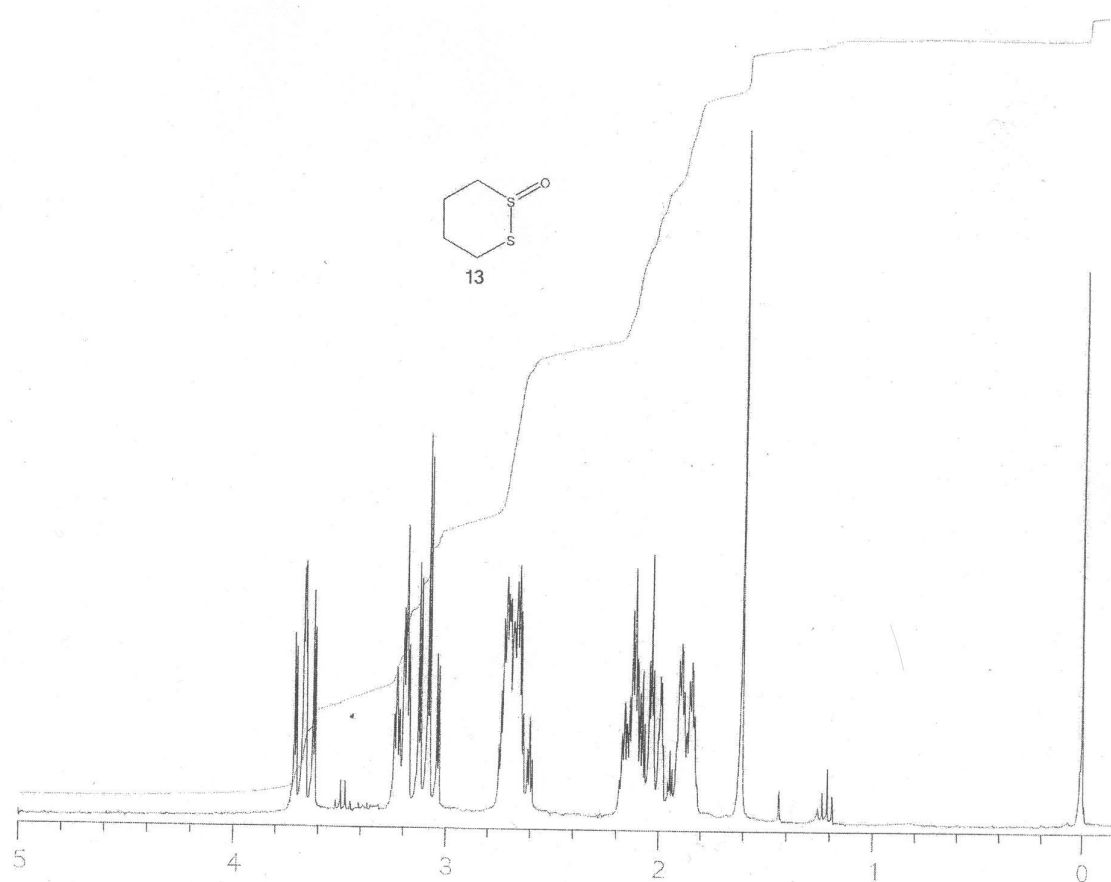

Supplement: c4ra02923b3.pdf [file c4ra02923b3.pdf]

(ii)  $^1\text{H}$ -NMR spectrum of compound 12 (300MHz,  $\text{CDCl}_3$ )

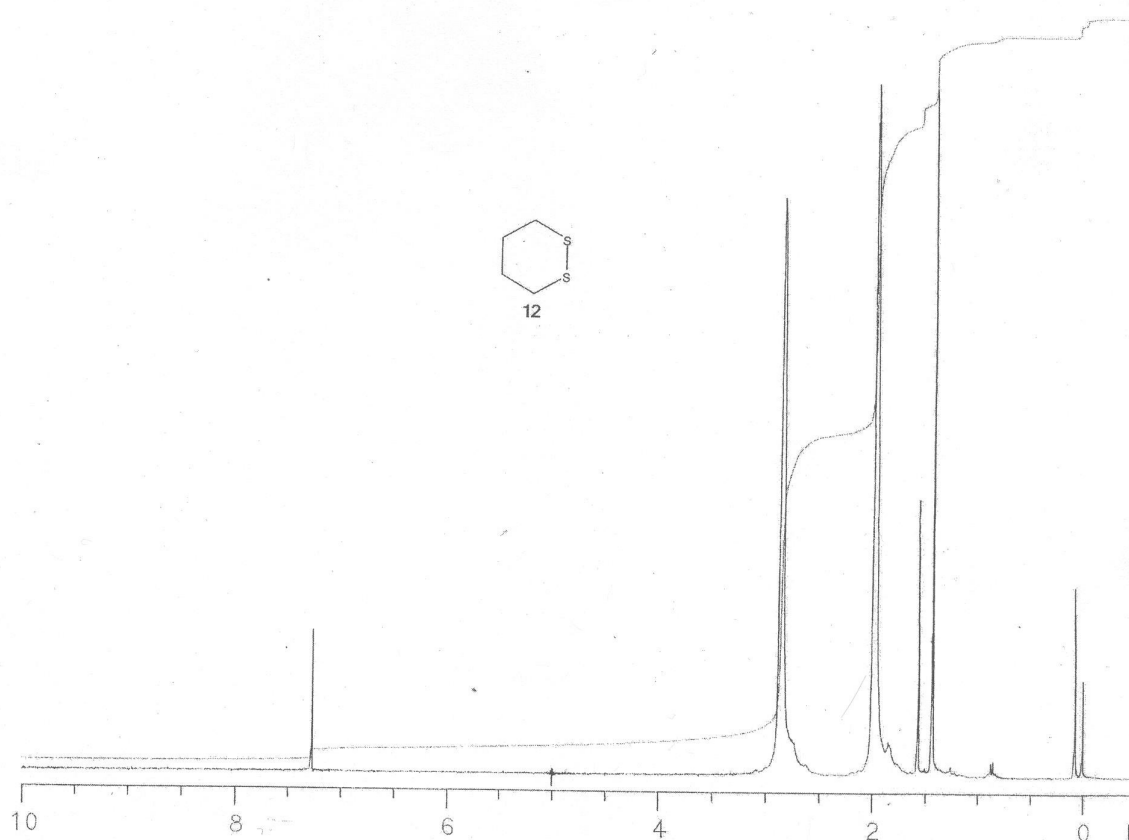

Supplement: c4ra02923b4.pdf [file c4ra02923b4.pdf]

(vii)  $^1\text{H}$ -NMR spectrum of compound 18 ( 500MHz,  $\text{CDCl}_3$ )

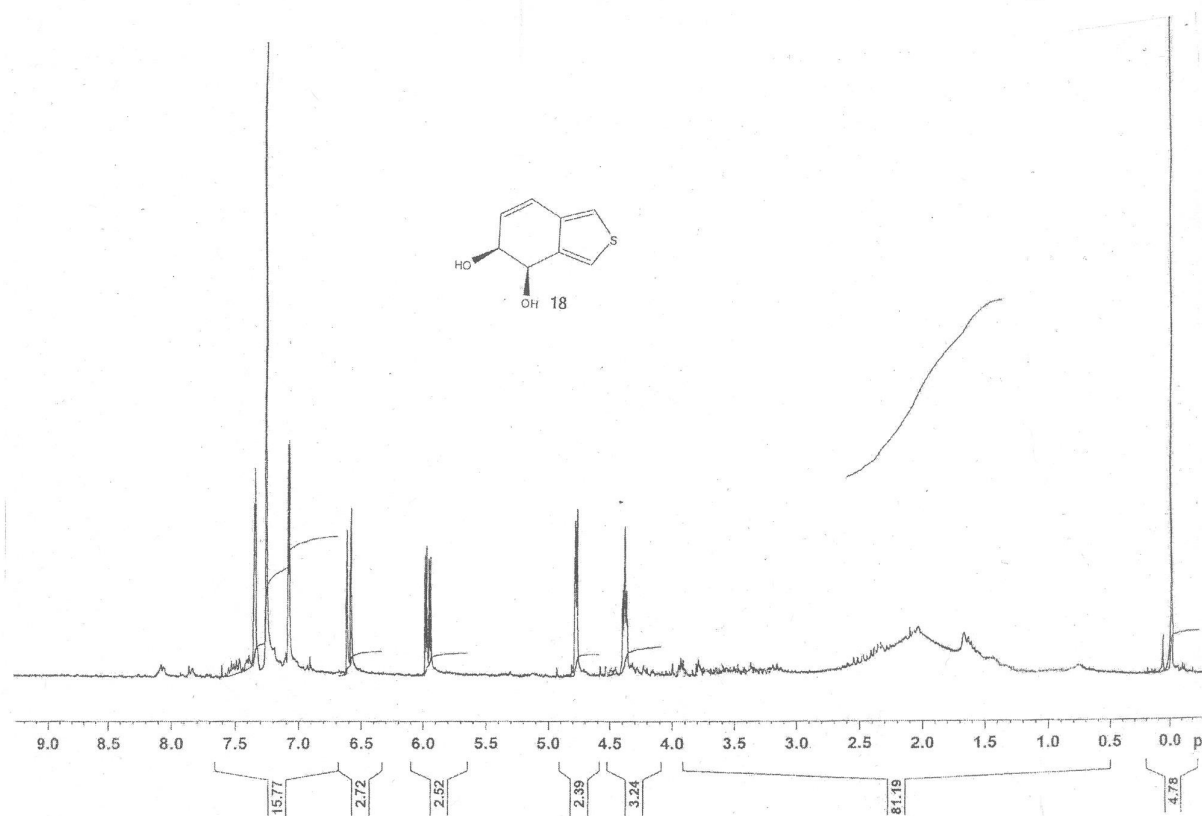

Supplement: c4ra02923b8.pdf [file c4ra02923b8.pdf]

(vi)  $^1\text{H-NMR}$  spectrum of compound 17 (500MHz,  $\text{CDCl}_3$ )

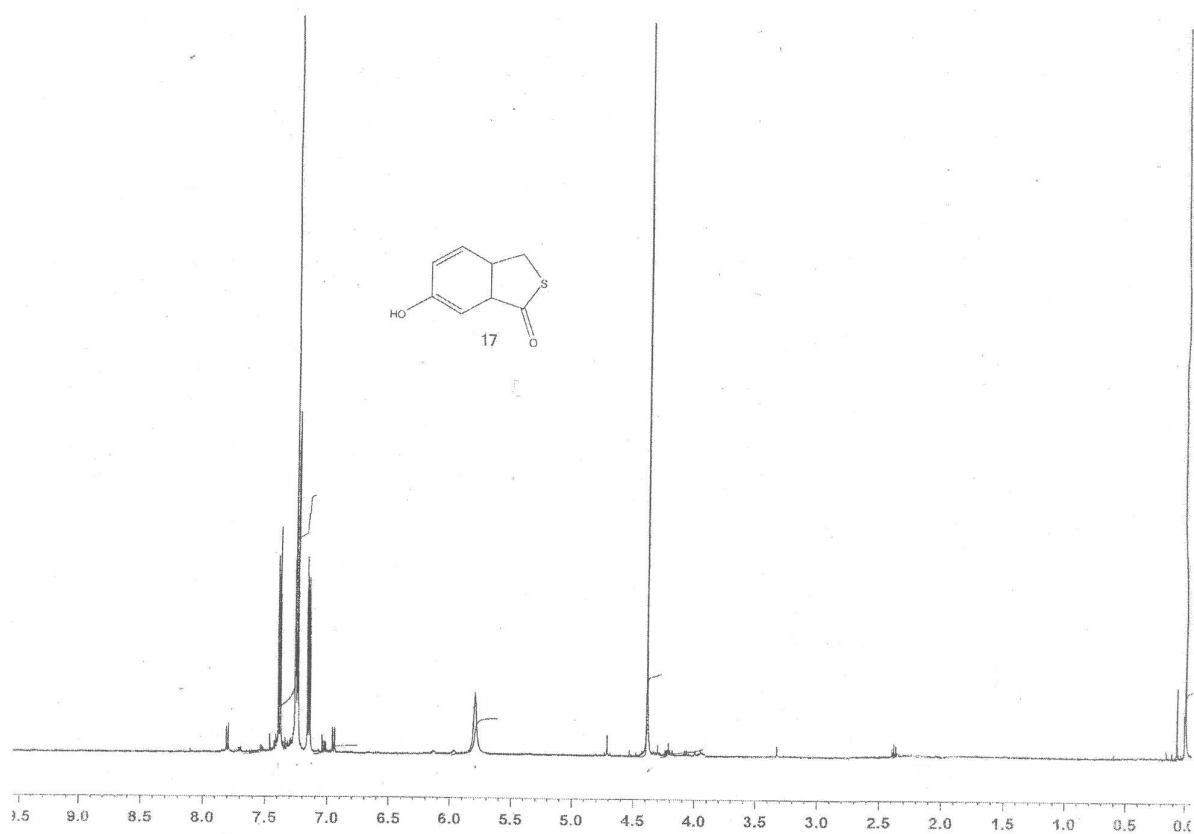

Supplement: c4ra02923b9.pdf [file c4ra02923b9.pdf]
